# Supplementary material for: Co-Gelation of Pumpkin-Seed Protein with Egg-White Protein
Source: MDPI journal article supplement (doi:10.3390/foods12102030), 2023-05-17
Supplement: s1 [file s1]

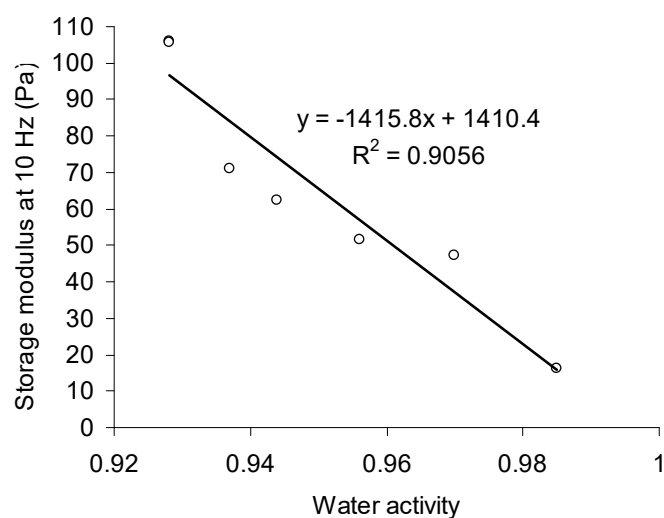

**Figure S1.** Correlation between water activity and storage modulus at 10 Hz.

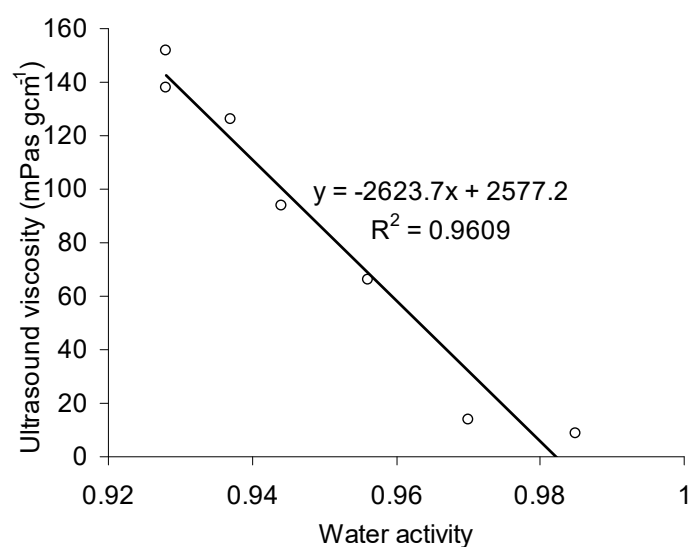

**Figure S2.** Correlation between water activity and ultrasound viscosity.

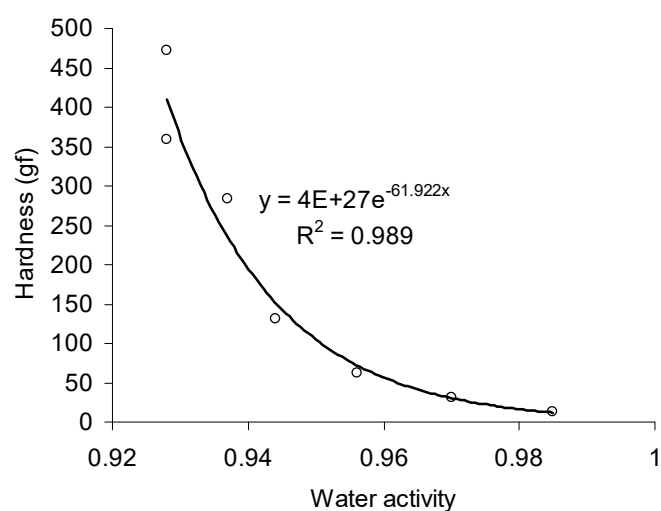

**Figure S3.** Correlation between water activity and hardness.
